# Supplementary material
Source: Elsevier journal article supplement (https://www.sciencedirect.com/science/article/pii/S0211699521000916)
Supplement: mmc1 [file S0211699521000916:mmc1.doc]

**SOFOSBUVIR-BASED REGIMENS FOR HCV IN ADVANCED CHRONIC KIDNEY DISEASE. A SYSTEMATIC REVIEW WITH META-ANALYSIS**

**LITERATURE SEARCH AND SELECTION**

**Meta-analyses** (*n*=3)

1. Li M, *et al.* Efficacy and safety of DAA based therapies for HCV patients with stage 4-5 CKD: A meta-analysis. *Virol J* 2019
2. Li T, *et al.* SOF-based regimen is safe and effective for HCV infected patients with stage 4-5 CKD: a systematic review and meta-analysis. *Liver Int* 2017
3. Liao H, *et al.* SOF in combination with DCV in LT recipients with HCV infection: A systematic review and meta-analysis. *Clin Res Hepatol Gastroenterol* 2017

**Reviews, Editorials** (*n*=74)

1. Lim T, *et al*. Use of sofosbuvir in CKD: is it necessary ? *Clin Mol Hepatol* 2017
2. Abdel-Rzek W, *et al.* Is sofosbuvir based therapy suitable for patients with advanced CKD ? *AP &T* 2018
3. Kidney Disease: Improving Global Outcomes (KDIGO) Hepatitis C Work Group. KDIGO 2018 Clinical Practice Guideline for the Prevention, Diagnosis, Evaluation, and Treatment of Hepatitis C in Chronic Kidney Disease. *Kidney Int Suppl* 2018; 8: 91-165
4. AASLD-IDSA HCV Guidance Panel. Hepatitis C Guidance: AASLD-IDSA Recommendations for Testing, Managing, and Treating Hepatitis C. <https://www.hcvguidelines.org/unique-populations/renal-impairment>. Last update: December 10, 2019
5. Thompson A, *et al.* Australian recommendations for the management of HCV: a consensus statement. *Med J Aust* 2016
6. Latt NL. Update on the management of HCV in the setting of CKD and RT. *Gastroenterol Hepatol* 2018
7. Jadoul M, Martin P. HCV treatment in CKD patients: The KDIGO perspective. *Blood Purif* 2017
8. Tang L, *et al.* Dual SOF and RBV therapy for chronic HCV. *Expert Rev Gastroenterol* *Hepatol* 2016; 10: 21-36
9. Bruchfeld A, Lindahl K. DAAs for HCV: clinical trials in pts with advanced CKD. *Semin Dial* 2019
10. Fabrizi F, Messa P. *G Ital Nefrol* 2016
11. Kanda T, *et al.* APASL clinical practice recommendation: how to treat HCV infected pts with renal impairment ? *Hepatol Int* 2019
12. Maruyama A, *et al.* A review of DAAs for HCV in pts with advanced CKD. *NDT* 2017
13. Fabrizi F, Negro F, *et al.* Expert opinion on the management of renal manifestations of chronic HCV. *Antiviral Ther* 2018
14. Kikuchi K. Treatment of HCV in dialysis pts. *Contrib Nephrol* 2018
15. Temesgen Z, *et al.* SOF for the treatment of chronic HCV. *Drugs Today* 2014
16. Abraham G, *et al.* SOF in the treatment of HCV: new dogs and new tricks. *Clin Infect* *Dis* 2014
17. Pol S, Parlati L. Treatment of hepatitis C: the use of new pangenotypic DAAs in special populations. *Liver Int* 2018
18. Vermehren J, *et al.* Challenges and perspectives of DAAs for the treatment of HCV. *J Hepatol* 2018
19. Carrier P, *et al.* Anti-HCV virus drugs and kidney. *World J Hepatol* 2016
20. Pearlman B. Review article: novel antivirals for SOF/VTP/VXL, GCP/PBV. *APT* 2018
21. Lens S, *et al*. Treating HCV in patients with renal failure. *Dig Dis* 2017
22. Cholongitas E, *et al.* IFN-free regimens in patients with HCV and renal dysfunction or RT. *World J Hepatol* 2017
23. Scotto R, *et al.* Real world efficacy and safety of pangenotypic DAAs against HCV. *Rev Recent Clin Trials* 2019
24. Fabrizi F, *et al.* DAAs for HCV in patients on dialysis. *IJAO* 2017
25. Degasperi E, *et al*. Treatment of extrahepatic manifestations of HCV. *Clin Liv Dis* 2017
26. Fabrizi F, *et al.* DAAS, HCV and dialysis: an update. *GIN* 2018
27. Fabrizi F, Messa P. Therapy of HCV by DAAs: the end of HCV in dialysis population ? *Expert Rev Clin Pharmacol* 2015
28. Liver Tox. HCV agents. NIDD and Kidney Diseases 2012-2018
29. Ladino M, Roth D. HCV in ESKD patients. *CJASN* 2018
30. Bunchortavakul C, *et al.* Management of pts with HCV and renal disease. *World J* *Hepatol* 2015
31. Ferenci P. Treatment of HCV in difficult-to-treat patients. *Nat Rev Gastroenterol* *Hepatol* 2015
32. Bunchorntavakul C, *et* *al.* Treatment of chronic HCV in special populations. *Gastroenterol Clin North Am* 2015
33. Marino Z, *et al.* Advances in HCV therapies. *Expert Opin Pharmacother* 2015
34. Zopf S, *et al.* Advances in hepatitis C therapy: What is the current state- what come’s next ? *World J Hepatol* 2016
35. Mucke M, *et al.* Special populations: treating HCV in pts with decompensated cirrhosis and/or advanced renal impairment. *Liver Int* 2017
36. Colombo M. IFN free therapy for HCV The hurdles amid a golden era, *Dig Liver Dis* 2015
37. Fabrizi F, *et al.* Novel antiviral agents for the treatment of HCV among RT recipients. *GIN* 2017
38. Carrion F, *et al.* What are the management issues for HCV in dialysis pts ? Natural history of HCV in dialysis. *Semin Dial* 2014
39. Barsa J, *et al.* A pleasant dilemma to have: to treat HCV in the waiting list or to treat post RT ? *Clin Transplant* 2015
40. Soriano V, *et al.* New HCV therapies for special patient populations. *Expert Opin* *Pharmacother* 2016
41. Puri P, *et al.* Consensus statement of HCV task force of the Indian national association for the study of the liver. Part 2: INASL recommendations for management of HCV in India. *J Clin Exp Hepatol* 2014
42. Hill L. HCV DAAs drug interactions and use in renal and liver impairment. *Top Antivir Med* 2015
43. El-Fishawy H, *et al.* Antiviral treatment prioritization in HCV infected patients with extrahepatic manifestations- an Egyptian perspective. *J Adv Res* 2016
44. Dashti-Khavidaki S, *et al*. Potential nephrotoxicity of SOF-based treatments in patients infected with HCV: a review on incidence. *Expert Rev Clin Pharmacol* 2018
45. Sorbera M, Friedman M, *et al.* New and emerging evidence on the use of second-generation direct acting antivirals for the treatment of HCV in renal impairment. *J Pharm Pract* 2017
46. Tang L, *et al.* Dual SOF and RBV therapy therapy for chronic HCV. *Expert Rev* *Gastroenterol Hepatol* 2016
47. Wanchoo R, Thakkar J, *et al.* Harvoni (ledipasvir with sofosbuvir) –induced renal injury. *Am J Gastroenterol* 2016
48. Zeuzem S. Treatment of HCV: state of art 2018. *Dtsch Med Wochenschr* 2018
49. Banerjee D, Reddy K, *et al.* Review article: safety and tolerability of DAAs in the new era of HCV therapy. *AP & T* 2016
50. Soriano V, *et al.* Drug interactions in HIV infected patients treated for HCV. *Expert Opin Drug Metab Toxicol* 2017
51. Jadoul M, Martin P. HCV treatment in CKD: the KDIGO perspective. *Blood Pur* 2017
52. Fabrizi F, *et al.* New treatment for HCV in CKD, dialysis, and transplant. *KI* 2016
53. Trombatt W, *et al.* Retrospective analysis of the medication utilization and clinical outcomes of patients treated with various regimens for HCV. *Pharm Pract* 2017
54. Tullio M, *et al.* Mixed cryoglobulinemia: a diagnostic and therapeutic challenge. *BMJ Case Rep* 2017
55. Carrion A, *et al.* What are the management issues for HCV in dialysis patients ? natural history of HCV in dialysis populations. *Semin Dial* 2014
56. JSH GL for the management of HCV: 2019 update protective effect of antiviral therapy against hepatocarcinogenesis. *Hepatol Res* 2020
57. Fabrizi F, *et al.* Managing HCV therapy failures and CKD. *Expert Rev Clin Pharmacol* 2018
58. Noell B, *et al*. Changing the face of HCV management- the design and development of SOIF. *Drug Des Devel Ther* 2015
59. Zhang Q, *et al.* Potential application of sofosbuvir-based treatment for chronic hepatitis C in China. *Zhonghua Gan Zang Bing Za Zhi* 2018
60. Colombo M. IFN-free therapy for HCV: the hurdles amid a golden era. *Dig Liver Dis* 2015
61. Premkumar M, *et al.* Chronic hepatitis C: Do generics work as well as branded drugs ? *J Clin Exp Hepatol* 2017
62. Carrion A, *et al.* What are the management issues for HCV in dialysis patients: natural history of HCV in dialysis population. *Semin Dial* 2014
63. Hoofnagle H, *et al.* Therapy for HCV- the costs of success. *NEJ Med* 2014
64. Wadhawan M, *et al.* Early acute severe HCV recurrence after transplantation: from universal mortality to cure. *Clin Exp Hepatol* 2017
65. Miro J, *et al.* Outcome and management of HCV/HIV coinfection pre- and post- liver transplant. A 2015 update. *J Hepatol* 2015
66. Solas C, *et al.* Ledipasvir and tenofovir drug interaction in human immunodeficiency virus-hepatitis C virus coinfected: impact on tenofovir trough concentrations and renal safety. *Br J Clin Pharmacol* 2018
67. Ramadori G, *et al.* Case report: 8 years after liver transplant: *de novo* hepatocellular carcinoma 8 months after HCV clearance through IFN-free antiviral therapy. *BMC Cancer* 2018
68. Pipili C, *et al.* Pharmaceutical management of HBV and HCV in liver and kidney transplant recipients. *World J Gastrointest Pharmacol Ther* 2015
69. Zopf S, *et al.* Advances in HCV therapy: What is the current state- what come’s next ? *WJH* 2016
70. Mendizabal M, *et al.* Chronic HCV and CKD: advances, limitations, and unchartered territories. *J Viral Hepat* 2017
71. D’Ambrosio R, *et al.* Assessing safety and efficacy of SOF for the treatment of HCV. *Expert Opin Drug Saf* 2015
72. Touissant Miller K, *et al.* Treatment considerations for unique patient populations with HCV genotype 1 infection*. Ann Pharmacother* 2015
73. Wu S, *et al.* Highly effective treatment response and well tolerability by all oral direct acting antivirals for HCV post organ transplantation. *J Chin Med Assoc* 2020
74. Floreani A, *et al.* Perspectives of fixed daily dose of SOF and LDV for the treatment of chronic HCV. *Expert Opin Pharmacother* 2015

**Original reports included in the current meta-analysis** (*n*=30)

1. Bhamidimarri K, Czul F, Peyton A, Levy C, Hernandez M, Jeffers L, Roth D, Schiff E, O’Brien C, Martin P. Safety, and efficacy and tolerability of half-dose sofosbuvir plus simeprevir in treatment of hepatitis C in patients with end stage renal disease. *J* *Hepatol* 2015; 63: 763-773
2. Hundemer G, Sise M, Wisocky J, Ufere N, Friedman L, Corey K, Chung T. Use of sofosbuvir-based direct-acting antiviral therapy for hepatitis C viral infection in patients with severe renal insufficiency. *Infect Dis (Lond)* 2015; 47: 924-929
3. Beinhardt S, Al Zoairy R, Ferenci P, Kozbial K, Freissmuth C, Stern R, Stattermayer A, Stauber R, Strasser M, Zoller H, Watschinger B, Schmidt A, Trauner M, Hofer H, Maieron A. DAA-based antiviral treatment of patients with chronic hepatitis C in the pre- and postkidney transplantation setting. *Transplant Int* 2016; 29: 999-1007
4. Saxena V, Koraishy F, Sise M, Lim J, Schmidt M, Chung T, Liapakis A, Nelson D, Fried M, Terrault N, and HCV-TARGET. Safety and efficacy of sofobuvir-containing regimens in hepatitis C-infected patients with impaired renal function. *Liver Int* 2016; 36: 807-816
5. Nazario H, Ndungu M, Modi A. Sofosbuvir and simeprevir on hepatitis C genotype 1 –patients with end-stage renal disease on haemodialysis or GFR < 30 ml/min. *Liver Int* 2016; 36: 798-801
6. Desnoyer A, Pospai D, Le M, Gervais A, Heurgue-Berlot A, Laradi A, Harent S, Pinto A, Salmon D, Hillaire S, Fontaine H, Zucman D, Simonpoli A, Muret P, Larrouy L, Chabert B, Descamps D, Yazdanpanah Y, Peytavin G. Pharmacokinetics, safety and efficacy of a full-dose sofosbuvir-based regimen given daily in haemodialysis patients with chronic hepatitis C. *J Hepatol* 2016; 65: 40-47
7. Aggarwal A, Yoo E, Perumpail R, Cholankeril G, Kumari R, Daugherty T, Lapasaran A, Ahmed A. Sosfobuvir use in the setting of end-stage renal disease: a single center experience. *J Clin Transplant Hepatol* 2017; 5: 23-26
8. Choudhary N, Kumar A, Bodh V, Bansal S, Sharma R, Jain M, Saigal S, Saraf N. Efficacy and safety of sofosbuvir-based regimens in chronic hepatitis C patients on dialysis. *Ind J Gastroenterol* 2017; 36: 113-116
9. Sperl J, Frankova S, Merta M, Tothova M, Spicak J. Combination of sofosbuvir and daclatasvir in the treatment of genotype 3 chronic hepatitis C virus infection in patients on maintenance haemodialysis. *Ther Clin Risk Man* 2017; 13: 733-738
10. Cox-North P, Hawkins K, Rossiter S, Hawley M, Bhattacharya R, Landis C. Sofosbuvir-based regimens for the treatment of chronic hepatitis C in severe renal dysfunction. *Hepatol Comm* 2017; 1: 248-255
11. Saab S, Jimenez M, Bau S, Choi G, Durazo A, El-kabany M, Han S, Busuttil R. Use of sofosbuvir-based treatment of chronic hepatitis C in liver transplant recipients on haemodialysis. *J Clin Gastroenterol* 2017; 51: 167-173
12. Dumortier J, Bailly F, Pageaux G, Vallet-Pichard A, Raadenne S, Habersetzer F, Gagnieu M, Grange J, Minello A, Guillaud O, Kamar N, Alric L, Leroy V. Sofosbuvir-based antiviral therapy in hepatitis C virus paatients with severe renal failure. *Nephrol Dial Transplant* 2017; 32: 2065-2071
13. Kumar M, Nayak S, Gupta E, Kataria A, Sarin S. Generic sofosbuvir-based direct-acting antivirals in hepatitis C virus-infected patients with chronic kidney disease. *Liver Int* 2018; 38: 2137-2148
14. Singh A, Kumari S, Kumar P, De A, Singh V. Sofosbuvir with NS5A inhibitors in hepatitis C virus infection with severe renal insufficiency. *J Viral Hepat* 2018; 25: 1501-1056
15. Mehta R, Desai K, Kabrawala M, Nandwani S, Shah J, Desai N, Parekh. V. Preliminary experience with sosfosbuvir-based treatment regimens for patients dependent on haemodialysis. *Ind J Gastroenterol* 2018; 37: 72-73
16. Akhil M, Kirushnan B, Martin M, Arumugam K, Prasad N, Ravichandran R. Sofosbuvir-based treatment is safe and effective in Indian hepatitis C patients on maintenance haemodialysis: A retrospective study. *Nephrology* 2018; 23: 446-4452
17. He Y, Yang S, Hu C, Dong J, Gao H, Yan T, Liu J, Yang Y, Ren D, Zhu L, Zhao Y, Chen T. Safety and efficacy of sofosbuvir-based treatment of acute hepatitis C in end-stage renal disease patients undergoing haemodialysis. *Aliment Pharmacol Ther* 2018; 47: 526-532
18. Taneja S, Duseja A, De A, Mehta M, Ramachandran R, Kumar V, Kohli H, Gupta K, Dhiman R, Chawla Y. Low-dose sofosbuvir is safe and effective in treating chronic hepatitis C in patients with severe renal impairment or end-stage renal diseases. *Dig Dis Sci* 2018; 63: 1334-1340
19. Butt A, Ren Y, Puenpatom A, Arduino J, Kumar R, Abou-Samra A. Effectiveness, treatment completion and safety of sofobuvir/ledipasvir and paritaprevir/ritonavir/ombitasvir+dasabuvir in patients with chronic kidney disease: an ERCHIVES study. *Aliment Pharmacol Ther* 2018; 48: 35-43
20. Garcia-Agudo R, Aoufi-Rabih S, Salgueira-Lazo M, Gonzalez-Corvillo C, Fabrizi F. ‘Real-life’experience with direct-acting antiviral agents for hepatitis C virus in end-stage renal disease. *Int J Artif Organs* 2018; 41: 363-370
21. Surendra M, Raju S, Sridhar N, Vijay Kiran B, Rajesh G, Anvesh G, Raju N. Ledipasvir and sofosbuvir for untreated HCV genotype 1 infection in end stage renal patients: a retrospective observational study. *Hemodial Int* 2018; 22: 217-221
22. Borgia S, Dearden J, Yoshida E, Shafran S, Brown A, Ben-Ari Z, Cramp M, Cooper C, Foxton M, Rodriguez C, Esteban R, Hyland R, Lu S, Kirby B, Meng A, Maarkova S, Dvory-Sobol H, Osinusi A, Bruck R, Ampuero J, Ryder S, Agarwal K, Fox R, Shaw D, Haider S, Willems B, Lurie Y, Calleja J, Gane E. Sofosbuvir/velpatasvir for 12 weeks in hepatitis C virus-infected patients with end-stage renal disease undergoing dialysis. *J Hepatol* 2019; 71: 660-665
23. Eletreby R, El-Serafy M, Anees M, Kasem G, Salama M, Elkhouly R, Hamdy M, Haleem H, Kamal E, Abdel-Razek W, salama R, Elshenawy M, Shafeek A, hassany M, El-Sayed M, El-Shazly Y, Esmat G. Sofosbuvir-containing regimens are safe and effective in the treatment of HCV patients with moderate to severe renal impairment. *Liver Int* 2019;
24. Wiegand J, Buggisch P, Mauss S, Boeker K, Klinker H, Muller T, Gunther R, Serfert Y, Manns M, Zeuzem S, Berg T, Hinrichsen H, German Hepatitis C-Registry (Deutsches Hepatitis C-Register). *Eur J* *Gastroenterol Hepatol* 2019; 31: 1424-1431
25. Butt N, Abbasi A, Khan M, Ali M, Mahesar G, Haleem F, Manan A. Treatment outcomes for patients undergoing hemodialysis with chronic hepatitis C on the sofosbuvir and daclatasvir regimen. *Cureus* 2019; 11: e5702
26. Seo H, Seo M, Yoon S, Choi J, Ko S. Full-dose sofosbuvir plus low-dose ribavirin for hepatitis C virus genotype 2-infected patients on haemodialysis. *Korean J Intern Med* 2019;
27. Goel A, Bhadauria D, Kaul A, Verma P, Mehrotra M, Gupta A, Sharma R, Rai P, Aggarwal R. Daclatasvir and reduced-dose sofosbuvir: An effective and pangenotypic treatment for hepatitis C in patients with estimated glomerular filtration rate <30 mL/min. *Nephrology* 2019; 24: 316-321
28. Debnath P, Chandnani S, Rathi P, Nair S, Pawar V, Contractor Q. Combined NS5A & NS5B nucleotide inhibitor therapy for patients with chronic hepatitis C with stage 5 chronic kidney disease on haemodialysis. *Arq Gastroenterol* 2020-03-22
29. Michels F, Amaral A, Carvalho-Filho R, Vieira G, Souza A, Ferraz M. Hepatitis C treatment of renal transplant and chronic kidney disease patients: efficacy and safety of direct-acting antiviral regimens containing sofosbuvir. *Arq Gastroenterol* 2020
30. Poutschi H, Jabbari S, Merat S, Sharifi A, Shayesteh A, Shayesteh E, Minakari M, Fattahi M, Moini M, Roozbeh F, Mansour-Ghanaei F, Afshar B, Mokhtare M, Amiriani T, Sofian M, Somi M, Agah S, Melki I, Latifnia M, Abdizadeh M, Hormati A, Khoshnioa M, Sohrabi M, Malekzadeh Z, Merat D, Malekzadeh R. The combination of sofosbuvir and daclatasvir is effective and safe in treating patients with hepatitis C and severe renal impairment. *J Gastroenterol Hepatol* 2020; Jan 29. doi: 10.1111/jgh.14994

**Original reports not included in the current meta-analysis (no info on SVR)** (*n*=12)

1. Yan T, *et al.* Recurrent hyperkalemia in patients with CKD and HCV treated with DAAs. *BMC Infect Dis* 2019
2. Teegen E, *et al.* Evaluation of histologic dynamics, kidney function and diabetes in liver transplant pts after antiviral treatment with DAAs: therapy of HCV-recurrence. *Transplant Infect Dis* 2019
3. Kwo P, *et al.* New hepatitis C virus therapies: drug classes and metabolism, drug interactions relevant in the transplant settings, drug options in decompensated cirrhosis and drug option in ESRD. *Curr Opin Organ Transplant* 2015
4. German P, *et al.* Clinical pharmacokinetics and pharmacodynamics of LDV/SOF a fixed dose combination tablet for the treatment of HCV. *Clin Pharmacokinet* 2106
5. Solas C, *et al*. Ledipasvir and tenofovir drug interaction in HIV-HCV coinfected pts: impact on tenofovir through concentrations and renal safety. *Br J Clin Pharmacol* 2018
6. D’Ambrosio R, *et al*. Renal safety in 3264 HCV patients treated with DAA based regimens: results form a large Italian real life study. *Dig Liver Dis* 2020
7. Smolders E, *et al.* Pharmacokinetics, efficacy and safety of hepatitis C virus drugs in patients with liver and/or renal impairment. *Drug Saf* 2016
8. Kirby B, *et al.* Pharmacokinetic, pharmacodynamic, and drug-interaction profile of the hepatitis C virus NS5B polymerase inhibitor SOF. *Clin Pharmacokinet* 2015
9. Cuenca Lopez F, Rivero A, *et al.* Pharmacokinetics and pharmacodynamics of SOF and LDV for the treatment of HCV. *Expert Opin Drug Metab Toxicol* 2017
10. Touissant Miller KA, *et al.* Treatment considerations for unique patient populations with HCV genotype 1 infection. *Pharmacother* 2015
11. de Kanter C, *et al.* Viral hepatitis C therapy: pharmacokinetic and pharmacodynamic considerations. *Clin Pharmacokinetic* 2014
12. Smolders E, *et al.* Viral HCV therapy: pharmacokinetic and pharmacodynamic considerations : A 2019 update. *Clin Pharmacokinet* 2019

**SOF in patients with 4-5 CKD (including abstracts)** (*n*=9)

1. Chuang W, Hu T, Buggisch P, Moreno C, Su W, Biancone L, Hyland R, Lu S, Markova S, Dvory-Sobel D, Osinusi A, Gaggar A, Peng C, Liu C, Sise M, Mangia A. Ledipasvir/sofosbuvir for 8, 12, or 24 weeks is safe and effective in patients undergoing dialysis. *J Hepatol* 2019; 70: e225
2. Rosenblatt R, Mehta A, *et al.* Baseline creatinine clearance is a predictor of worsening renal function while on HCV treatment with sofosbuvir/ledipasvir. *J Hepatol* 2016; 64 Suppl.: S8 19
3. Mallet V, Parlati L, *et al.* Estimated glomerular filtration rate variations and direct acting antivirals treatment for chronic hepatitis C: a retrospective longitudinal study. *J Hepatol* 2018; 68: S22
4. Gonzalez-Parra E, Soledad P, *et al.* Renal function evolution in patients infected with HCV and basal estimated glomerular filtration rate between 30-60 mL/min/1.3 mq treated with ombitasvir/paritaprevir/ritonavir and dasabuvir vs. regimens based on sofosbuvir. EASL Special Conference, September 23-24, 2016
5. Reply to: ‘Therapeutic drug monitoring for SOF and DCV in transplant recipients with chronic HCV and adavanced renal disease’. *J Hepatol* 2016
6. Hachicha M, *et al.* SOF and DCV combination therapy in HD patient with LT. *Nephrol Ther* 2016
7. Rossato G, et al. Treatment of chronic HCV in CKD with SOF-based regimens. Braz Infect Dis 2020
8. Maruyama A, *et al.* Successful treatment of HCV with SMV/SOF/ and RBV in an HIV coinfected LT recipient with advanced CKD. *Can J Infect Dis Med Microbiol* 2016
9. Mandhwani A, *et al.* A review of DAAs for the treatment of HCV in advanced CKD. *NDT* 2017

**SOF in patients with 1-3 CKD** (*n*=55)

1. Rosenblatt R, Mehta A, Wagner M, Kumar S. Baseline creatinine clearance is a predictor of worsening renal function while on HCV treatment with sofosbuvir-ledipasvir. *J Hepatol* 2016; 64 Suppl: S819
2. Sise M, Backman E, Ortiz G, Hundemer G, Ufere N, Chute D, Brancale J, Xu D, Wisocky J, Lin M, Kim A, Thadhani R, Chung R. Effect of sofosbuvir-based hepatitis C virus therapy on kidney function in patients with CKD. *Clin J Am Soc Nephrol* 2017; 12: 1615-1623
3. Gonzalez-Parra E, *et al.* Renal function evolution in patients infected with HCV and basal estimated glomerular filtration rate between 30-60 mL/min/ 1.73 m2 treated with PROD vs. Regimens based on SOF. EASL Special Conference September 23-24 2016
4. Mallet V, Parlati L, *et al.* Estimated glomerular filtration rate variations and direct acting antivirals treatment for chronic hepatitis C: a retrospective longitudinal study. *J Hepatol* 2018; 68: S22
5. Fabrizi F, *et al.* Managing HCV therapy failures and CKD. *Expert Rev Clin Pharmacol* 2018; 11: 1135-1142
6. Rossato G, *et al.* Treatment of chronic HCV in patients with CKD with SOF-based regimens. *Braz J Infect Dis* 2020; 24: 25-29
7. Mendizabal M, *et al.* Chronic HCV and CKD: Advances, limitations and unchartered territories. *JVH* 2017
8. Fabrizi F, *et al.* New treatment for hepatitis C in chronic kidney disease, dialysis, and transplant. *Kidney Int* 2016
9. Brown P, *et al.* AKI injury in pts on HCV treatment with ledispavir/SOF. *Hepatol Commun* 2018; 2: 1172-1178
10. Butt A, *et al.* HCV treatment initiation in CKD in the DAAs era: results from ERCHIVES. *Liver Int* 2018
11. Shih H, *et al.* Efficacy and safety of SOF-based regimens for treatment in chronic HCV genotype 1 patients with moderately impaired renal function. *Clin Mol Hepatol* 2017
12. Elmowarfy A, *et al.* High rate of AKI in CKD and HCV genotype 4 treated with DAAs. *Int Urol Nephrol* 2019
13. Liu C, *et al.* Evolution of eGFR in chronic HCV receiving SOF-based or SOF-free DAAs. *J Hepatol* 2020
14. Okubo T, *et al.* Efficacy and safety of LDV/SOF for HCV genotype 1 pts with moderate renal impairment. *Hepatol Int* 2018
15. Michal J, *et al.* Incidence of AKI in pts coinfected with HIV and HCV receiving renofovir fumarate and LDV/SOF in a real world urban clinic. *AIDS Res Hum Retroviruses* 2018
16. Medeiros T, *et al.* Renal safety after one year of SOF-based therapy for HCV: A Brazilian real life study. *J Clin Pharm Ther* 2018
17. Maan R, *et al.* The frequency of AKI in pts with chronic HCV treated with SOF based regimens. *APT* 2017
18. Ridruejo E, and Fabrizi F. Efficacy and safety of DAAs for HCV in mild-to-moderate CKD. *Nefrologia* 2020
19. Tamai H, *et al.* Real world safety and efficacy of sofosbuvir and ledipasvir for elderly patients. *JGH Open* 2018
20. Anty R, Favre G, Coilly A, *et al.* Safety of sofosbuvir-based regimens after liver transplantation: longitudinal assessm ent of renal function in the prospective ANRS C023 CUPILT study. *AP & T* 2018
21. Moreno-Planas J, *et al.* Influence of baseline MELD score in the efficacy of treatment of HCV with SMV /SOF. *Enferm Infecc Microbiol Clin* 2018
22. D’Ambrosio R, *et al.* Assessing safety and efficacy of SOF for the treatment of HCV. *Expert Opin Drug Saf* 2015
23. Shoreibah M, Romano J, *et al.* Effect of HCV treatment on renal function in LT patients. *J Clin Transl Hepatol* 2018
24. Hezode C, *et al.* Daclatasvir plus sofosbuvir, with or without ribavirin, for HCV genotype 3 in a French early access program *Liver Int* 2017
25. Fabrizi F, *et al.* Immunosuppressive and antiviral treatment of HCV-associated glomerular disease: a long term follow- up. *IJAO* 2018
26. Scotto R, *et al.* Real-world efficacy and safety of pangenotypic DAAs against HCV infection. *Rev Recent Trials* 2019
27. Faisal N, *et al.* Impact of sofosbuvir –based regimens for the treatment of HCV after LT on renal function: Results of a Canadian National Retrospective Study. *Exp Clin Transplant* 2019
28. Ashraf T, *et al.* Acute interstitial nephritis associated with sofosbuvir and daclatasvir. *ACG Case Rep* 2017
29. Fabbri G, *et al.* Reactivation of occult HBV infection in an HIV/HCV co-infected patient successfully treated with sofosbuvir/ledipasvir: a case report and review of the literature. *BMC Infect Dis* 2017
30. Tsuji K, *et al.* Real world efficacy and safety of ledipasvir and sofosbuvir in patients with HCV genotype 1 infection: a nationwide multicenter study by the Japanese Red Cross Liver Study Group. *J Gastroenterol* 2018
31. Murakami N, *et al.* Recurrent membranous nephropathy and acute cellular rejection in a petint treated with direct anti-HCV therapy (ledipasvir/sofosbuvir). *Transplant Infect Dis* 2018
32. Vavassori A, *et al.* Biliary and kidney lithiasis during treatment with daclatasvir/sofosbuvir/ribavirin and atazanavir/ritonavir+abacavir/lamivudine in an HIV/HCV genotype 4 infected patient: a case report. *Recenti Progr Med* 2017
33. Butt A, *et al.* Do directly acting antiviral agents for HCV increase the risk of hepatic decompensation and decline in renal function ? Results from ERCHIVES. *AP & T* 2017
34. Pariente A, *et al.* HCV treatment with all-oral direct-acting antivirals: Effectiveness and tolerance in a multicenter, prospective, observational study from French general hospitals. *Presse Med* 2019
35. Wanchoo R, *et al.* Harvoni (ledipasvir plus sofosbuvir) –induced renal injury. *Am J Gastroenterol* 2016
36. Bunnell K, *et al.* Nephrotoxicity associated with concomitant use of ledipasvir –sofosbuvir and tenofovir in a patient with HCV and HIV co-infection. *Pharmacotherapy* 2016
37. Degasperi E, *et al.* Treatment of extrahepatic manifestations of HCV. *Clin Liver* *Dis* 2017
38. Nwachukwu J, *et al.* Possible simeprevir/sofosbuvir induced hepatic decompensation with acute kidney failure. *Fed Pract* 2016
39. Mirabella M, *et al.* Successful recovery of associated interstitial nephritis and focal segmental glomerulosclerosis in patients with HCV and HIV treated with sofosbuvir and daclatasvir and revision of the literature. *Clin Nephrol Case Stud* 2018
40. Chowdury R, *et al.* Recurrent mixed cryoglobulinemia despite SVR to treatment: A case report. *AJKD* 2017
41. Strazzulla A, *et al.* Evolution of GFR rates and neutrophil gelatinase-associated lipocalin during treatment with DAAs. *Clin Mol Hepatol* 2018
42. Sise M, *et al.* Treatment of HCV virus-associated mixed cryoglobulinemia with DAAS. *Hepatology* 2016
43. Serota D, *et al.* Acute kidney injury in a patient on tenofovir alafenamide fumarate after initiation of treatment for HCV infection. *Open Forum Infect Dis* 2018
44. D’Ambrosio R, *et al. Renal* safety in 3264 HCV patients treated with DAA based regimens: Results form a large Italian real-life study. *Dig Liver Dis* 2020
45. Chen C, *et al.* Incidence, risk factors and impact on virologic response of anemia in chronic genotype 2 HCV screening receiving sofosbuvir plus ribavirin. *J Formos Med Assoc* 2020
46. Murakami C, *et al.* Antiviral medications for the treatment of HBV and HCV infection and their effects on kidney function. *Minerva Gastroenterol Dietol* 2014
47. El-Fishawy H, *et al.* Antiviral treatment prioritization in HCV infected patients with extrahepatic manifestations- an Egyptian perspective. *J Adv Res* 2016
48. Nada A, *et al.* Serum neutrophil gelatinase-associated lipocalin in HCV positive Egyptian patients on SOF. *Can J Gastroenterol Hepatol* 2020
49. Kwo P, *et al.* New HCV therapies: drug classes and metabolism, drug interactions relevant in the transplant settings, drug options in decompensated cirrhosis, and rug options in ESRD. *Curr Opin Organ Transplant* 2015
50. Zalawadiya Z, *et al.* Trends in renal function among heart transplant recipients of donor-derived HCV. *ASAIO J* 2019
51. Tang L, *et al.* Dual SOF and RBV therapy for chronic HCV. *Expert Rev* *Gastroenterol Hepatol* 2016
52. Dashti Khavidaki S, *et al.* Potential nephrotoxicity of SOF based treatment in patients with HCV: a review on incidence. *Expert Rev Clin Pharmacol* 2018
53. Teegen E, *et al.* Evaluation of histological dynamics, kidney function and diabetes in LT patients after antiviral treatment with DAAs: Therapy of HCV recurrence. *Transplant Infect Dis* 2019
54. Fabrizi F, *et al.* HCV-induced glomerular disease and PRESS after LT. Case report and literature review. *SJKDT* 2019
55. Moreno-Ramirez M, *et al.* DAAs in RT recipients with HIV HCV co-infection: report of our experience and literature review. *Transplant Proc* 2020

**Original reports not included in the current meta-analysis (limited number of pts)** (*n*=16)

1. Maruyama A, *et al.* Successful treatment of HCV with SMV, SOF and RBV in an HIV coinfected LT patient with advanced CKD. *Can J Infect Dis Med Microbiol* 2016
2. Gevers T, *et al.* Full dose SOF and DCV for chronic HCV in HD pts. *Neth J Med* 2016
3. Llenas-Garcia J, *et al.* SOF plus DCV as an alternative for pts on HD with HCV genotype 2. *Enferm Infecc Microbiol Clin* 2018
4. Rodriguez Gil F, *et al.* SOF antiviral therapy in HCV pos with several renal failure. *Gastroenterol Hepatol* 2017
5. Abad S, *et al.* Effectiveness of DAAs in HCV infection in HD pts. *Nefrologia* 2017
6. Rodriguez Gil F, *et al.* Sofosbuvir antiviral therapy in HCV patients with severe renal failure. *Gastroenterol Hepatol* 2017
7. Sho T, Suda G, Nagasaka A, *et al.* Safety and efficacy of sofosbuvir and ribavirin for HCV genotype 2 HCV Japanese patients with renal dysfunction. *Hepatol Res* 2018
8. Hachicha M, *et al.* SOF and DCV combination therapy in HD pt with LT. *Nephrol Ther* 2016
9. Perumpail R, *et al.* SOF and SMV combination therapy in the setting of LT and HD. *Transplant Infect* *Dis* 2015
10. Perumpail R, *et al.* A new standard of care ? Standard dose sofosbuvir in an HCV infected LT recipient on HD. *Dig Dis Sci* 2016
11. Fabrizi F, *et al.* HCV induced glomerular disease and posterior reversible encephalopathy syndrome after liver transplant case report and literature review. *SJKDT* 2019
12. Begovac J, *et al.* Successful treatment of genotype 3 HCV infection in a noncirrhotic HIV infected patient on chronic dialysis with the combination of SOF and VEL: a case report. *Medicine (Baltimore)* 2018
13. Hachicha M, *et al.* SOF and DCV combination therapy in HD patients with LT. *Nephrol Ther* 2016
14. Balwani M, *et al.* Hepatitis C virus, directly acting antivirals and Guillan Barrè syndrome. *SJKDT* 2018
15. Zubkin M, *et al.* Successful treatment of HCV with simeprevir, sofosbuvir, and ribavirin in an HIV coinfected liver transplant patient with advanced chronic kidney disease. *Can J Infect Dis Med Microbiol* 2016
16. Kawagishi N, *et al.* Safety of DAAs for renal function in post kidney transplant patients infected with HCV and a 100% 12-week SVR: a single center study. *Ther Apher* 2020

**Original reports not included in the current meta-analysis (RT recipients)** (*n*=58)

1. Duerr M, *et al.* A prospective study of daclatasvir and SOF in HCV-infected RT recipients. *BMC Nephrol* 2019
2. Etik O, *et al.* Successful treatment with DAAs of HCV in ESRD and RT recipients. *Exp Clin* *Transplant* 2019
3. Successful treatment with DAAs of HCV in patients with ESRD and RT recipients: Erratum. *Transplantation 2*018
4. Huang H, *et al.* Treatment of chronic HCV with SOF/DCV in RT recipients. *Transplant Infect* *Dis* 2019
5. Kamar N, *et al*. Efficacy and safety of SOF-based antiviral therapy to treat HCV after RT. *Am J Transplant* 2016
6. Sawinski D, *et al.* Successful post transplant treatment of HCV with LDV/SOF in HIV positive RT recipients. *Transplantation* 2017
7. Lin M, *et al*. Efficacy and safety of DAAs in RT recipients with HCV. *PLoS One* 2016
8. Musialik J, *et al*. Effectiveness efficacy and safety of SOF therapy against HCV after RT. *Transplant Infect Dis* 2019
9. Gendia M, *et al.* Impact of HCV and DAAs on RT recipients: a retrospective study. *Transplant Int* 2019
10. Rostaing L, *et al.* Use of DAAs for HCV positive RT candidates and RT recipients. *Transplant Int* 2016
11. Fernandez I, *et al.* Efficacy and tolerability of IFN-free antiviral therapy in RT recipients with HCV. *J Hepatol* 2017
12. Morales A, *et al.* LDV/SOF is effective and well tolerated in post RT recipients with chronic HCV. *Clin Transplant* 2017
13. Sawinski D, *et al.* Successful treatment of HCV in RT recipients with DAAs. *Am J Transplant* 2016
14. Goel A, *et al.* Experience with DAAs for treating HCV in RT recipients. *Indian J Gastroenterol* 2017
15. Deng G, *et al.* SOF monotherapy for asymptomatic and noncirrhotic HCV infection in a renal retransplantation recipient: a case report. *Transplant Proc* 2016
16. Lubetzky M, *et al.* Safety and efficacy of treatment of HCV in RT recipients with DAAs. *Transplantation* 2017
17. Soriano V, *et al.* Drug interactions in HIV infected patients treated for HCV. *Expert Opin Drug Metab Toxicol* 2017
18. Eisenberger U, Guberina H, Willuweit K, Bienholz A, Kribben A, Gerken G, Witzke O, Herzer K. Successful treatment of chronic HCV infection with sofosbuvir and ledipasvir in renal transplant recipients. *Transplantation* 2017
19. Friebus-Kardash J, *et al.* Successful early sofosbuvir-based antiviral treatment after transplant of kidneys from HCV viremic donors into HCV negative recipients. *Transpl Infect Dis* 2019
20. Schrezenmeier E, Hoffmann F, *et al.* Pharmacokinetics of daclatasvir, sofosbuvir, and GS -331007 in a prospective cohort of HCV virus-positive kidney transplant recipients. *Ther Drug Monit* 2019
21. Husson J, *et al.* Eight weeks of ledipasvir/sofosbuvir in kidney transplant recipients with HCV genotype 1 infection. *Transplant Direct* 2017
22. Lawson-Ananissoh L, *et al.* Effectiveness of the treatment of chronic HCV infection genotype 2 by the combination sofosbuvir/ledipasvir in a black African kidney transplant. *West Afr J Med* 2019
23. Sabbatini M, *et al.* Eradication of HCV in renal transplant recipients and its effects on quality of life. *Bio Med Res Int* 2018
24. Rangaswamy D, *et al.* DAAs against HCV in renal transplant recipients: is it the dawn of an interferon-free era ? *SJKDT* 2017
25. Sise M. Kidney transplant recipients with HCV experienced 100% SVR response at 12 weeks when treated with SOF/LDV. *Hepatology* 2017
26. Hanif F, *et al.* Effectiveness of SOF and RBV for eradicating HCV in RT recipients in Pakistan: when resources are scarce. *Exp Clin Transplant* 2017
27. Karkout K, *et al.* Possible acute rejection associated with the use of the new anti-HCV virus medications. *Avicenna J Med* 2019
28. Suarez Bejumea A, *et al.* HCV in KT recipients: a problem on the path to eradication. *Transplant Proc* 2016
29. Mansour M, *et al.* Safety and effectiveness of DAAs for the treatment of HCV in pts with solid organ transplant. *J Transplant Infect Dis* 2018
30. Fernandez Ruiz M, *et al.* Impact of anti-HCV DAAs on graft function and immunosuppressive drug levels in kidney transplant recipients. *Transplant Int* 2018
31. Bonacci M, Londono M, *et al.* Antiviral treatment with SOF and SMV in a kidney transplant recipient with HCV-decompensated cirrhosis- viral eradication and removal from the LT waiting list. *Transpl Int* 2015
32. Kogiso T, *et al.* Hepatocellular carcinoma after direct-acting antiviral drug treatment in patients with HCV virus. *JGH Open* 2018
33. Laub M, *et al.* Effects of sofosbuvir-based HCV treatment regimens on calcineurin inhibitor dosing in liver and kidney transplant recipients. *J Exp Clin* *Transplant* 2019
34. El Maghrabi H, *et al.* Treatment of chronic hepatitis C infection among Egyptian kidney transplant recipients: a pilot study. *Exp Clin Transplant* 2019
35. Maghrabi H, *et al.* Efficacy and safety of the new antiviral agents for the treatment of HCV in Egyptian RT recipients. *Int J Urol Nephrol* 2019
36. Gentil M, *et al.* HCV treatment with DAAs in RT recipients: preliminary results from a multicenter study. *Transplant Proc* 2016
37. de Sa Guimaraes Cerqueira S, *et al.* Successful treatment of chronic hepatitis C in a kidney transplant patient with only two weeks of DAA therapy. *Nefrologia* 2018
38. Wadhawan M, *et al.* Early acute severe HCV recurrence after transplantation: from universal mortality to cure. *J Clin Exp Hepatol* 2017
39. Dharancy S, *et al.* Direct-acting antiviral agent-based regimens for HCV recurrence after combined liver kidney transplantation. Results from the ANRS C023 CULPIT study. *Am J Transplant* 2017
40. Sawinski D, *et al.* Use of HCV positive donors does not affect HCV clearance with DAAs therapy but shortens the wait time to kidney transplant. *Transplantation* 2017
41. Akin M, *et al.* Effectiveness and safety of sofosbuvir/ledipasvir + ribavirin treatment in liver and or renal transplant patients with chronic HCV: a single center experience. *SAGE Open Med* 2018
42. Reau N, *et al.* Glecaprevir/pibrentasvir treatment in liver or kidney transplant patients with HCV. *Hepatology* 2018
43. Durand C, *et al.* DAAs prophylaxis in KT from HCV infected donors to noninfected recipients : an open label nonrandomized trial. *Ann Intern Med* 2018
44. Jha R, *et al.* Ledipasvir and sofosbuvir for treatment of postRT HCV: a Case report with review of literature. *Indian J Nephrol* 2016
45. Sharma S, *et al.* Role of DAAs in treatment of HCV in RT patients. *J Transplant* 2018
46. Chute D, *et al.* DAAs for HCV in the RT recipient. *Kidney Int* 2018
47. Reddy S, *et al.* Efficacy and safety of SOF based therapy to treat HCV after RT. *Clin Kidney J* 2018
48. Colombo M, *et al.* Treatment with LDV SOF for 12 or 24 weeks in RT recipients with chronic HCV genotype 1 or 4 infection: A randomized trial. *Ann Intern Med* 2017
49. Weigert A, *et al.* HCV eradication in KT recipients: a single center experience in Portugal. *Transplant Proc* 2018
50. Kawagishi N, *et al.* Safety of DAAs for renal function in postKT patients infected with HCV and 100% 12 week SVR a single center study. *Ther Apher Dial* 2020
51. Karjkout K, *et al.* Possible acute rejection associated with the use of the new anti-HCV medications. *Avicenna J Med* 2019
52. Prasad N, Patel M, *et al.* DAAs in HCV infected RT recipients: treatment and outcome experience from single center. *Ind J Nephrol* 2018
53. Delabaudiere C, *et al*. Successful treatment of fibrosing cholestatic hepatitis with pegylated IFN, RBV, and sofosbuvir after a combined RT liver transplant. *Transpl Int* 2015
54. Gonzalez Corvillo C, *et al.* DAAs for the treatment of kidney transplant patients with HCV in Spain: a long term prospective observational study. *Transplant Direct* 2019
55. Murakami N, *et al.* Recurrent membranous nephropathy and acute cellular rejection in a patient treated with DAAs (LDV/SFV). *Transpl Infect Dis* 2018
56. Perumpail R, *et al.* SOF and SMV combination therapy in the setting of LT and haemodialysis. *Transpl Infect Dis* 2015
57. Globke B, et al. Treatment of HCV recurrence after transplantation with SOF/LDV: the role of RBV. *Transpl Infect Dis* 2017
58. Xue Y, *et al.* Efficacy and safety of SOF/DCV in treatment of KT recipients with HCV infection. *WJG* 2017

**Original reports not included in the current meta-analysis (duplicate info)** (*n*=1)

1. Butt A, *et al.* SOF-based regimens in clinical practice achieve SVR rates closer to clinical trials results from ERCHIVES. *Liver Int* 2016

**Original reports not included in the current meta-analysis (limited details)** (*n*=1)

1. Faisal N, *et al*. Impact of sofobuvir-based regimens for the treatment of hepatitis C after liver transplant on renal function: results of a Canadian National Retrospective Study. *Exp Clin Transplant* 2019; 1: 59-63
